# Supplementary material
Source: PubMed Central journal article supplement (PMC7249247)
Supplement: NIHMS1582613-supplement-supplement.pdf [file NIHMS1582613-supplement-supplement.pdf]

## **Supplemental Information:**

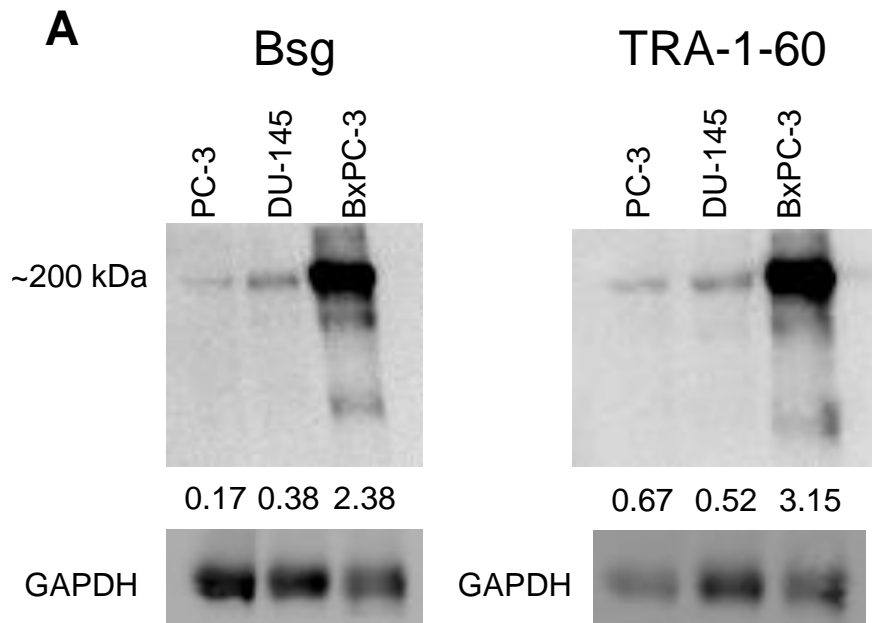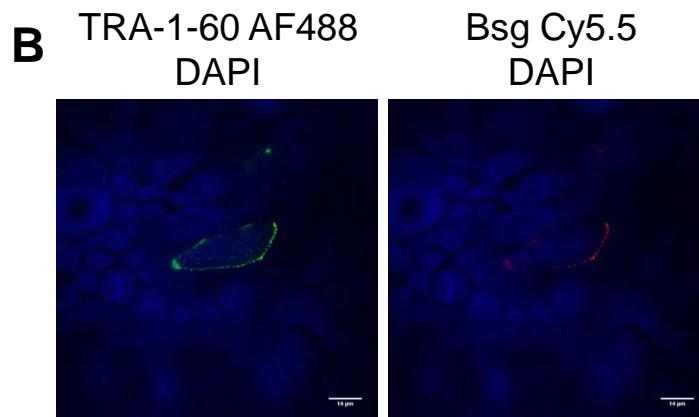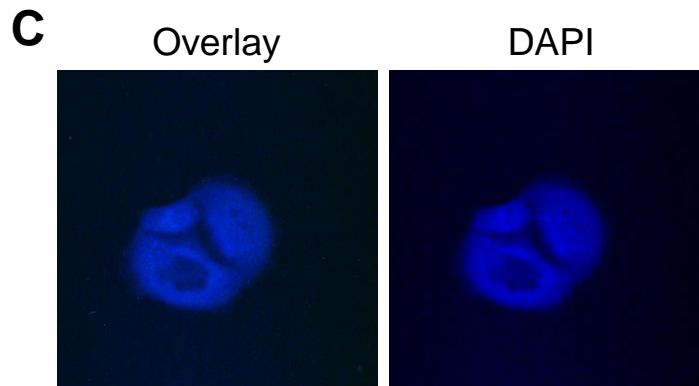

**Figure S1. A.** TRA-1-60 expression in *ex vivo* PC-3, DU-145 and BxPC-3 tumor lysates was detected with Bsg (left panel) and a commercially available antibody against TRA-1-60 (right panel). Densitometry analysis measured the ratio of protein to GAPDH loading control. **B.** Positive cell confocal imaging using anti-TRA-1-60-AF488 (Left) and Bsg-Cy5.5 (Right) with DAPI overlay and **C.** negative confocal images overlay (anti-TRA-1-60-AF488 and Bsg-Cy5.5 with DAPI) and DAPI images.

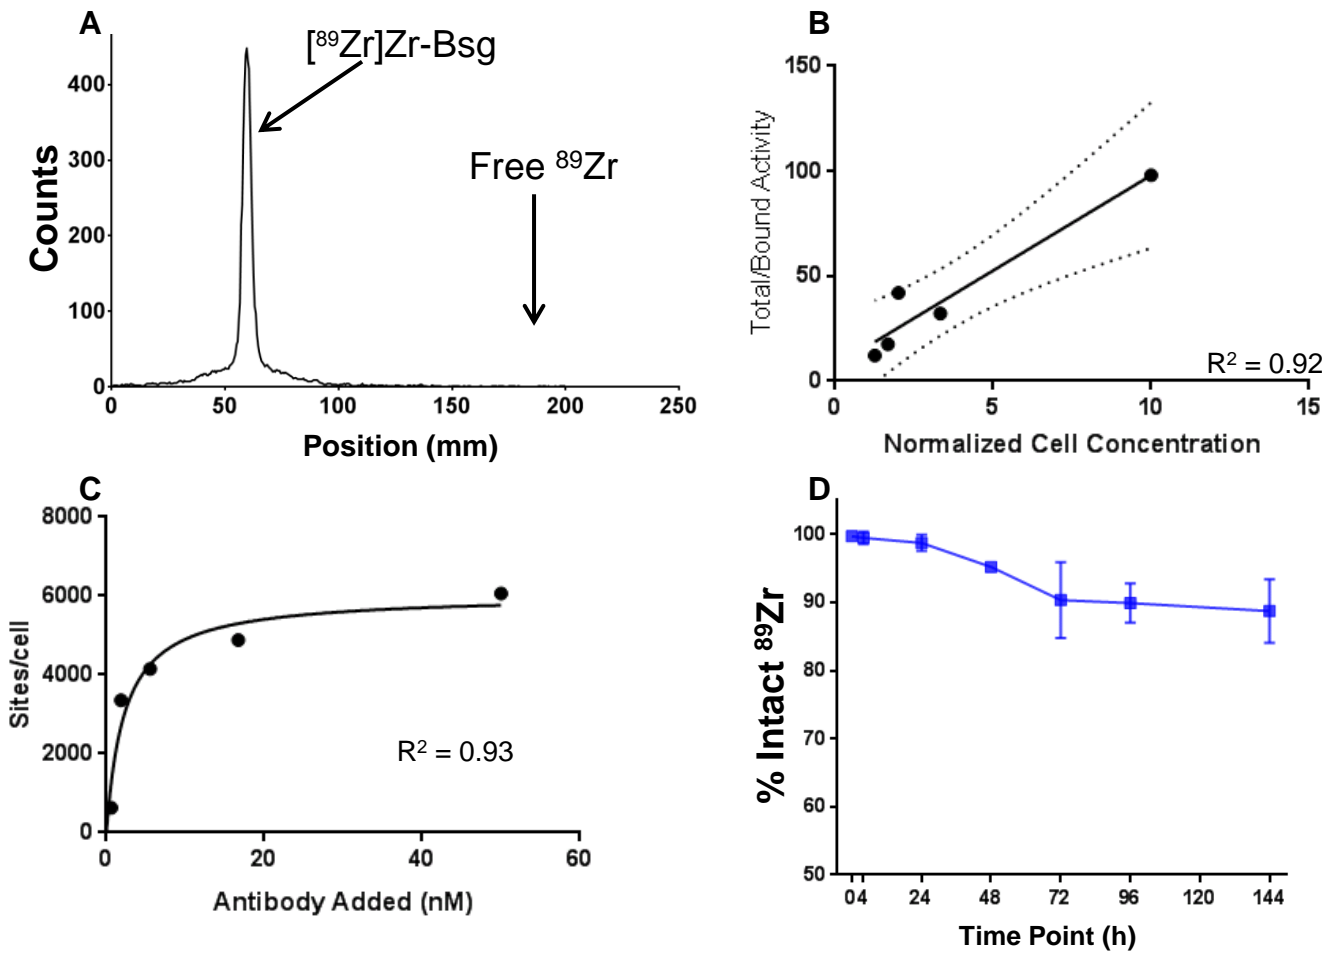

**Figure S2.**  $[^{89}\text{Zr}]\text{Zr-DFO-Bsg}$  tracer characterization as examined through **A.** iTLC, **B.** immunoreactivity, **C.** binding affinity and **D.** *in vitro* stability in saline 4-144 h incubation at 37 °C.

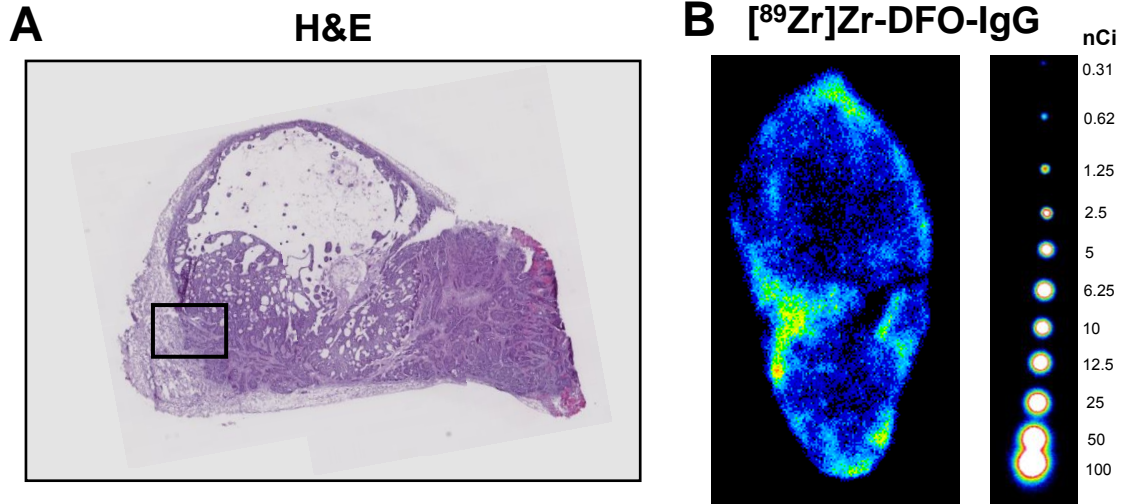

**Figure S3. A.** H&E stain of BxPC-3 tumor injected with [ $^{89}\text{Zr}$ ]Zr-DFO-Bsg. Black box represents the area measured for autoradiography. **B.** *Ex vivo* autoradiography of a tumor slice from BxPC-3 tumor bearing mice injected with [ $^{89}\text{Zr}$ ]Zr-DFO-IgG sacrificed at 120 h p.i. Autoradiographs were calibrated against respective  $^{89}\text{Zr}$  standards (right).

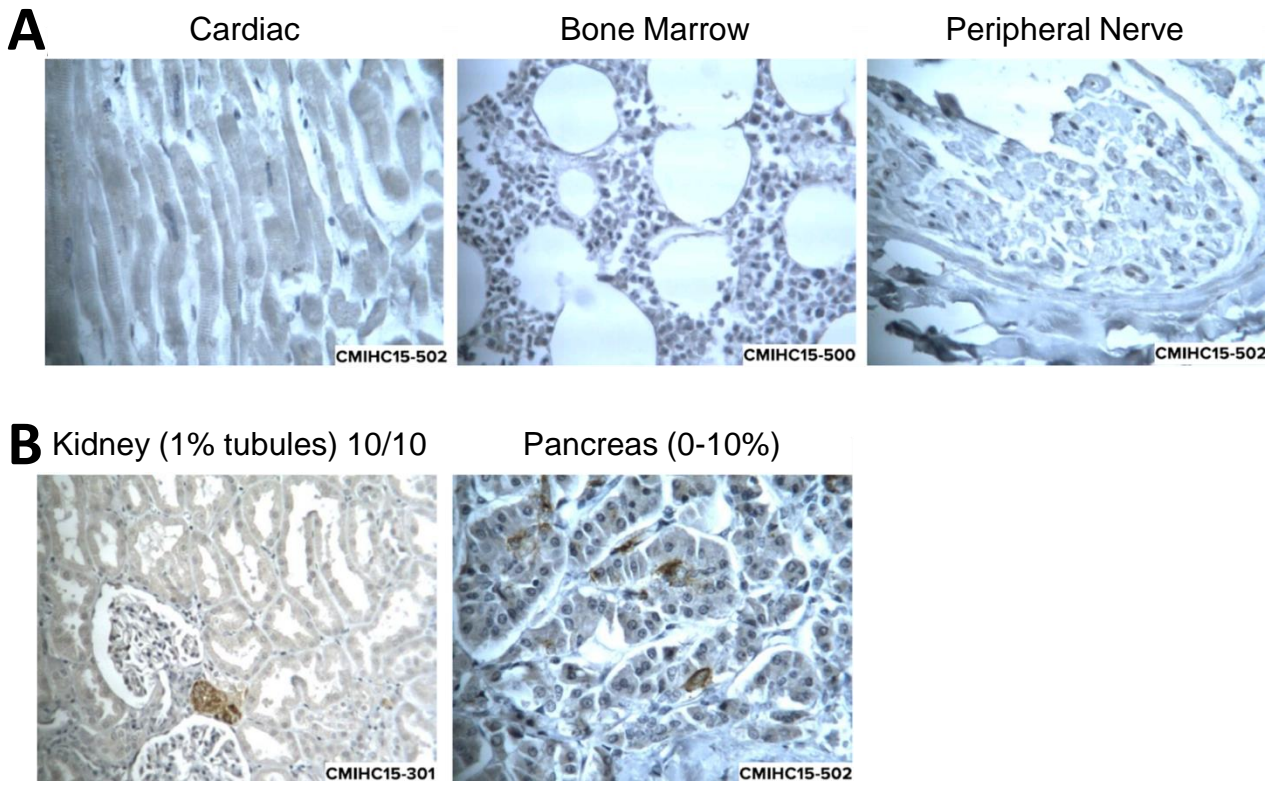

**Figure S4. A.** Negative control normal tissues IHC stained with Bsg included cardiac (left), bone marrow (middle) and peripheral nerve (right). **B.** The kidney (left) and pancreas (right) exhibited minimal staining in comparison to positive samples.

**Table S1.** Internalization of [<sup>89</sup>Zr]Zr-DFO-Bsg in NCCIT

| Time Point (h) | % Membrane Bound | % Internalized | p-value |
|----------------|------------------|----------------|---------|
| 6              | 0.6 ± 0.2        | 0.7 ± 0.1      | < 0.01  |
| 24             | 0.5 ± 0.1        | 2.3 ± 0.3      | < 0.01  |
| 48             | 0.5 ± 0.3        | 3.5 ± 0.8      | < 0.01  |
| 72             | 0.5 ± 0.3        | 2.6 ± 0.4      | < 0.01  |

**Table S2.** %ID/g [<sup>89</sup>Zr]Zr-DFO-Bsg and [<sup>89</sup>Zr]Zr-DFO-IgG in BxPC-3 imaged mice.

| Time P.I. (h) | Bsg        |            |            |           | IgG       | p-values   |
|---------------|------------|------------|------------|-----------|-----------|------------|
|               | Tumor      | Heart      | Liver      | Muscle    | Tumor     | Tumor      |
| 4             | 4.1 ± 0.4  | 19.2 ± 3.6 | 18.9 ± 3.3 | 1.4 ± 0.3 |           |            |
| 24            | 12.2 ± 2.0 | 13.4 ± 2.8 | 13.4 ± 5.1 | 1.6 ± 0.1 | 3.6 ± 0.1 | p < 0.0001 |
| 48            | 15.4 ± 2.0 | 11.7 ± 2.5 | 13.1 ± 6.5 | 1.5 ± 0.1 | 4.3 ± 0.7 | p < 0.0001 |
| 72            | 15.4 ± 2.4 | 10.8 ± 2.8 | 13.3 ± 7.0 | 1.4 ± 0.3 |           |            |
| 120           | 17.0 ± 2.4 | 9.5 ± 3.2  | 14.0 ± 9.1 | 1.3 ± 0.1 | 4.1 ± 0.6 | p < 0.0001 |

**Table S3.** %ID/g [<sup>89</sup>Zr]Zr-DFO-Bsg and [<sup>89</sup>Zr]Zr-DFO-IgG in PC-3 imaged mice.

| Time P.I. (h) | Bsg       |            |            |           | IgG       | p-values |
|---------------|-----------|------------|------------|-----------|-----------|----------|
|               | Tumor     | Heart      | Liver      | Muscle    | Tumor     | Tumor    |
| 4             | 5.8 ± 0.9 | 17.6 ± 6.2 | 17.1 ± 5.9 | 1.6 ± 0.5 |           |          |
| 24            | 7.0 ± 1.1 | 12.0 ± 3.2 | 11.4 ± 3.5 | 1.9 ± 0.5 | 5.2 ± 1.6 | p = 0.29 |
| 48            | 6.9 ± 1.1 | 10.2 ± 2.0 | 9.8 ± 2.5  | 1.5 ± 0.3 | 4.9 ± 1.2 | p = 0.58 |
| 72            | 7.4 ± 1.0 | 8.8 ± 1.3  | 8.8 ± 2.0  | 1.4 ± 0.4 |           |          |
| 120           | 6.5 ± 1.3 | 7.9 ± 1.1  | 7.9 ± 1.1  | 1.0 ± 0.1 | 5.7 ± 1.2 | p = 0.26 |



**Table S4.** %ID/g from the biodistribution of [<sup>89</sup>Zr]Zr-DFO-Bsg injected BxPC-3-bearing mice.

|                | 24 h       | 48 h       | 72 h       | 72 h-block | 120 h      |
|----------------|------------|------------|------------|------------|------------|
| Blood          | 29.8 ± 4.5 | 27.0 ± 2.6 | 18.4 ± 4.1 | 19.4 ± 5.1 | 19.8 ± 2.6 |
| Tumor          | 12.6 ± 2.7 | 19.3 ± 2.4 | 13.5 ± 3.5 | 10.9 ± 6.6 | 15.5 ± 8.1 |
| Heart          | 5.0 ± 2.3  | 5.5 ± 2.4  | 4.3 ± 2.1  | 5.5 ± 1.4  | 4.4 ± 0.6  |
| Lungs          | 6.1 ± 3.6  | 2.4 ± 0.5  | 4.6 ± 3.5  | 2.2 ± 0.4  | 2.6 ± 1.6  |
| Liver          | 8.1 ± 4.0  | 4.2 ± 0.2  | 5.1 ± 1.8  | 4.4 ± 0.8  | 6.5 ± 4.3  |
| Kidney         | 6.7 ± 3.7  | 4.2 ± 2.6  | 6.4 ± 1.2  | 6.8 ± 2.7  | 4.9 ± 2.0  |
| Stomach        | 1.2 ± 0.7  | 0.7 ± 0.7  | 1.0 ± 0.5  | 1.1 ± 0.7  | 0.9 ± 0.7  |
| Sm. Intestines | 1.8 ± 0.4  | 1.6 ± 0.5  | 1.7 ± 0.7  | 1.8 ± 1.0  | 1.2 ± 0.7  |
| Lg. Intestines | 1.5 ± 0.7  | 1.5 ± 0.5  | 1.1 ± 0.4  | 1.0 ± 0.6  | 0.6 ± 0.2  |
| Spleen         | 5.0 ± 3.0  | 2.6 ± 1.5  | 2.2 ± 0.6  | 3.3 ± 1.9  | 6.9 ± 2.0  |
| Pancreas       | 1.9 ± 1.5  | 0.9 ± 0.4  | 0.9 ± 0.2  | 0.8 ± 0.09 | 1.9 ± 1.5  |
| Brain          | 0.8 ± 0.6  | 0.6 ± 0.4  | 0.3 ± 0.2  | 0.3 ± 0.1  | 0.6 ± 0.2  |
| Bone           | 3.5 ± 2.8  | 2.8 ± 1.2  | 3.3 ± 0.6  | 1.6 ± 1.0  | 3.3 ± 1.4  |
| Muscle         | 1.3 ± 0.7  | 0.6 ± 0.03 | 0.6 ± 0.07 | 0.5 ± 0.1  | 0.6 ± 0.2  |

**Table S5.** %ID comparison of [<sup>89</sup>Zr]Zr-DFO-Bsg in BxPC-3 tumors at all time points. The competitive inhibition with non-radiolabeled Bsg (~500 µg) at 72 h p.i. shows decreased tumor accumulation (p = 0.011).

|       | 24 h      | 48 h      | 72 h      | 72 h-block | 120 h     |
|-------|-----------|-----------|-----------|------------|-----------|
| Tumor | 4.5 ± 2.1 | 8.2 ± 5.0 | 8.4 ± 3.0 | 1.3 ± 0.7  | 4.9 ± 1.5 |
